# Supplementary material
Source: publisher figshare collection journal article supplement (https://tandf.figshare.com/ndownloader/files/20586426)
Supplement: Supplementary file 1 [file 20586426]

**Table S1** Impacts of echocardiographic RWT on the positive rates of electrocardiographic LVH stratified by echocardiographic LVH defined by LVMI/Height2.7*

|  | LVH by Cornell voltage | | | LVH by Sokolow-Lyon voltage | | | LVH by Peguero-Lo Presti voltage | | |
| --- | --- | --- | --- | --- | --- | --- | --- | --- | --- |
|  | *n* (%) | Adjusted OR (95%CI) | *P* value | *n* (%) | Adjusted OR (95%CI) | *P* value | *n* (%) | Adjusted OR (95%CI) | *P* value |
| Total |  |  |  |  |  |  |  |  |  |
| Echocardiographic LVH (-) |  |  |  |  |  |  |  |  |  |
| RWT ≤ 0.42 a | 265 (3.3) | 1 |  | 860 (10.8) | 1 |  | 1872 (23.5) | 1 |  |
| RWT > 0.42 b | 37 (5.5) | 1.31 (0.91–1.89) | 0.142 | 85 (12.6) | 1.32 (1.02–1.69) | 0.034 | 201 (29.7) | 1.42 (1.18–1.70) | < 0.001 |
| Echocardiographic LVH (+) |  |  |  |  |  |  |  |  |  |
| RWT ≤ 0.42 c | 191 (13) | 1 |  | 245 (16.7) | 1 |  | 534 (36.4) | 1 |  |
| RWT > 0.42 d | 119 (23.8) | 1.81 (1.39–2.36) | < 0.001 | 125 (25) | 1.16 (0.88–1.52) | 0.302 | 254 (50.8) | 1.51 (1.22–1.86) | < 0.001 |
| Male |  |  |  |  |  |  |  |  |  |
| Echocardiographic LVH (-) |  |  |  |  |  |  |  |  |  |
| RWT ≤ 0.42 a | 121 (3.2) | 1 |  | 732 (19.3) | 1 |  | 1,218 (32.1) | 1 |  |
| RWT > 0.42 b | 17 (6.0) | 1.73 (1.01–2.95) | 0.046 | 63 (22.4) | 1.20 (0.89–1.61) | 0.225 | 113 (40.2) | 1.48 (1.15–1.91) | 0.002 |
| Echocardiographic LVH (+) |  |  |  |  |  |  |  |  |  |
| RWT ≤ 0.42 c | 65 (12.8) | 1 |  | 185 (36.6) | 1 |  | 243 (48.0) | 1 |  |
| RWT > 0.42 d | 52 (22.7) | 1.68 (1.10–2.56) | 0.016 | 93 (40.6) | 1.01 (0.72–1.41) | 0.951 | 127 (55.5) | 1.21 (0.87–1.67) | 0.252 |
| Female |  |  |  |  |  |  |  |  |  |
| Echocardiographic LVH (-) |  |  |  |  |  |  |  |  |  |
| RWT ≤ 0.42 a | 144 (3.5) | 1 |  | 128 (3.1) | 1 |  | 654 (15.7) | 1 |  |
| RWT > 0.42 b | 20 (5.1) | 0.98 (0.60–1.62) | 0.945 | 22 (5.6) | 1.59 (0.99–2.56) | 0.056 | 88 (22.2) | 1.26 (0.97–1.64) | 0.080 |
| Echocardiographic LVH (+) |  |  |  |  |  |  |  |  |  |
| RWT ≤ 0.42 c | 126 (13.1) | 1 |  | 60 (6.2) | 1 |  | 291 (30.2) | 1 |  |
| RWT > 0.42 d | 67 (24.7) | 1.83 (1.30–2.58) | 0.001 | 32 (11.8) | 1.51 (0.94–2.43) | 0.086 | 127 (46.9) | 1.71 (1.28–2.27) | ＜0.001 |

Abbreviations: CI = confidence interval; LVH = left ventricular hypertrophy; OR = odds ratio; RWT = relative wall thickness.

Note: a, b, c and d represent four left ventricular geometric patterns (a: normal geometry; b: concentric remodeling; c: eccentric hypertrophy; d: concentric hypertrophy)

*: adjusted for age, gender and left ventricular mass index.
